# Supplementary material
Source: PubMed Central journal article supplement (PMC5053814)
Supplement: NIHMS6008-supplement-supplementary_figure_1.pdf [file NIHMS6008-supplement-supplementary_figure_1.pdf]

## SUPPLEMENTAL MATERIAL

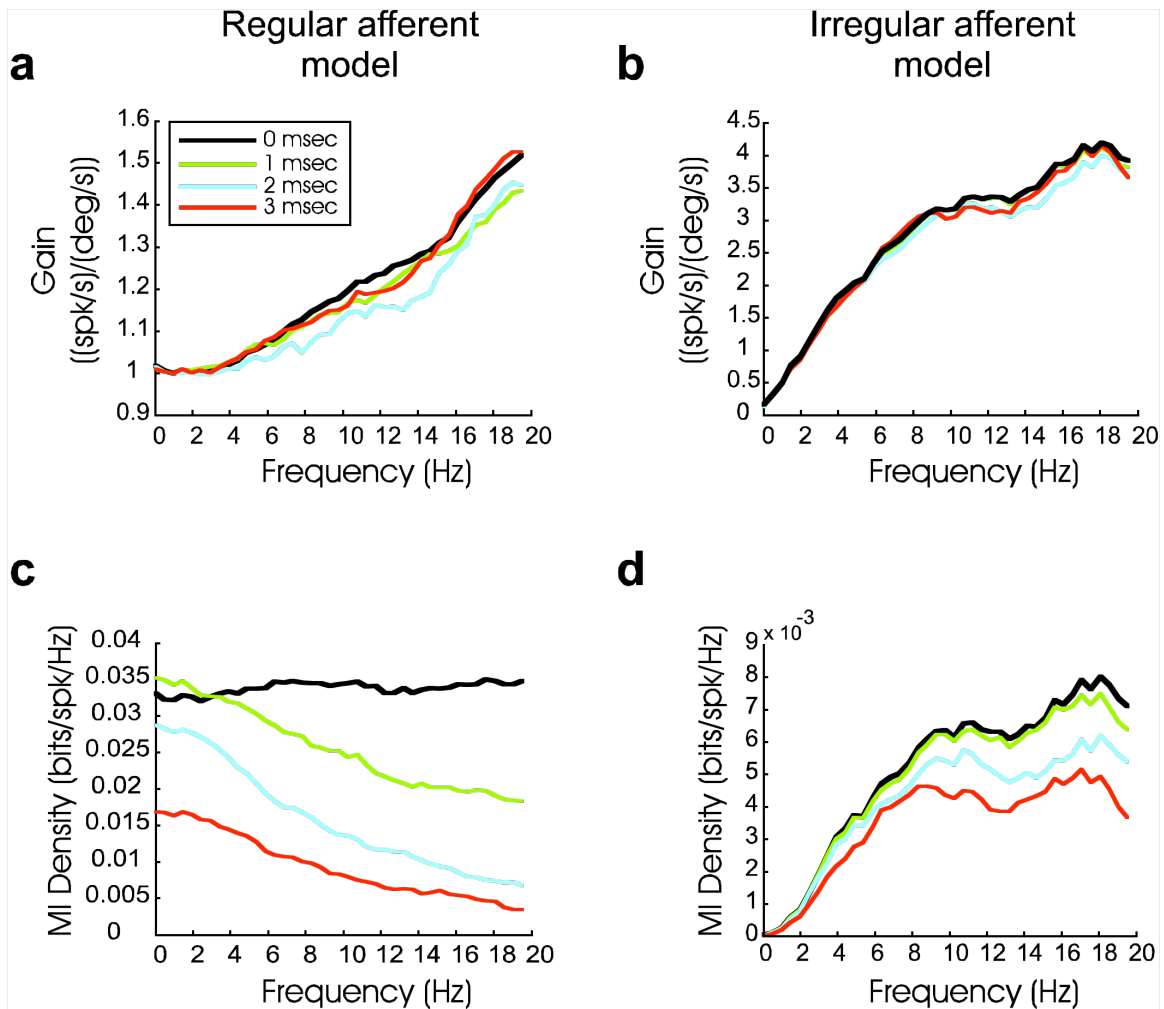

Effects of spike timing jitter on gain and mutual information density curves for the regular and irregular afferent models. (a) Gain curves obtained while varying the amount of spike timing jitter in the regular afferent model. Addition of spike timing jitter did not affect the gain values. (b) Gain curves obtained while varying the amount of spike timing jitter in the irregular afferent model. Addition of spike timing jitter did not affect the gain

values. (c) Mutual information density curves obtained while varying the amount of spike timing jitter in the regular afferent model. Addition of spike timing jitter decreased information significantly over the entire frequency range. (d) Mutual information density curves obtained while varying the amount of spike timing jitter in the irregular afferent model. The decrease seen was comparatively much less than the one seen for the regular afferent model.
